# Supplementary material for: miR-26a-5p inhibits the proliferation of psoriasis-like keratinocytes in vitro and in vivo by dual interference with the CDC6/CCNE1 axis
Source: Aging (Albany NY). 2024 Mar 5;16(5):4631–53. doi: 10.18632/aging.205618 (PMC10968694; doi:10.18632/aging.205618)
Supplement: Supplementary Figures [file aging-16-205618-s001.pdf]

## SUPPLEMENTARY FIGURES

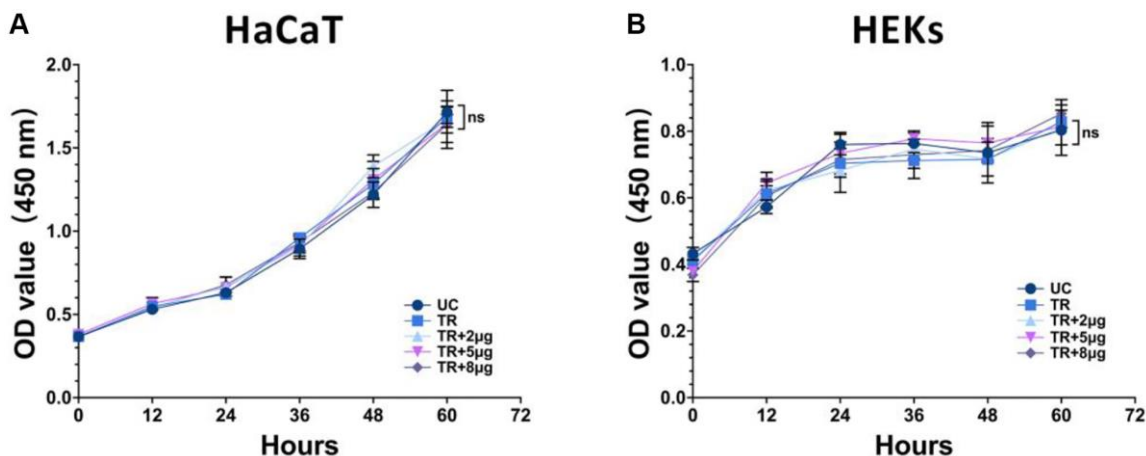

**Supplementary Figure 1.** Comparison of proliferative ability of HaCaT cells (A) and HEKs (B) transfected with three different amounts of miR-26a-5p mimics (2, 5 and 8 µg) with negative controls. Abbreviations: UC: Untreated control; TR: Transfection reagent; Ns: no significance.

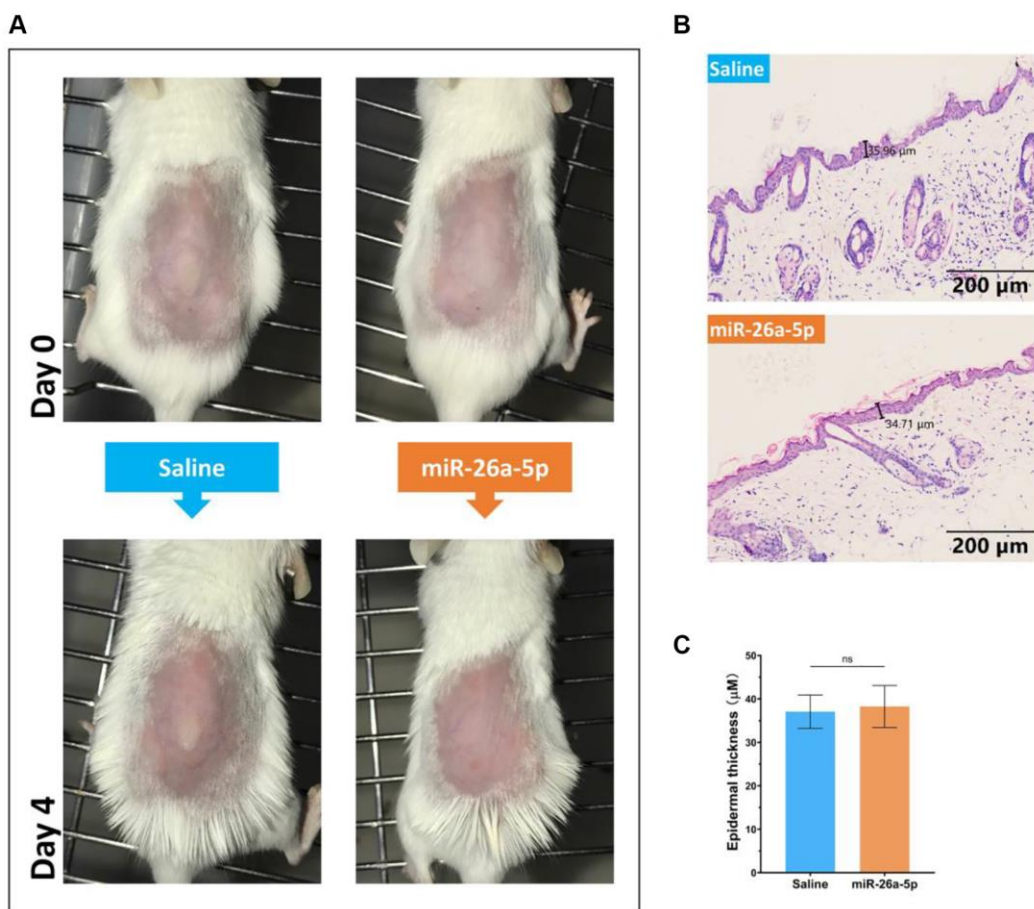

**Supplementary Figure 2.** Experiment on the safety of miR-26a-5p mimics to normal mouse skin without IMQ induction. (A) Skin appearance comparison between mice injected with Saline and 10 µg miR-26a-5p. (B) Graphs of H&E-stained skin tissue sections and (C) Comparison of thickness of the skin epidermal layers. Abbreviation: Ns: no significance.
